# Supplementary material for: NCOA1 promotes angiogenesis in breast tumors by simultaneously enhancing both HIF1α- and AP-1-mediated VEGFa transcription
Source: PubMed Central journal article supplement (PMC4695159; doi:10.18632/oncotarget.4341), 2015-06-20
Supplement: oncotarget-06-23890-s001.pdf [file oncotarget-06-23890-s001.pdf]

## SUPPLEMENTARY FIGURES AND TABLES

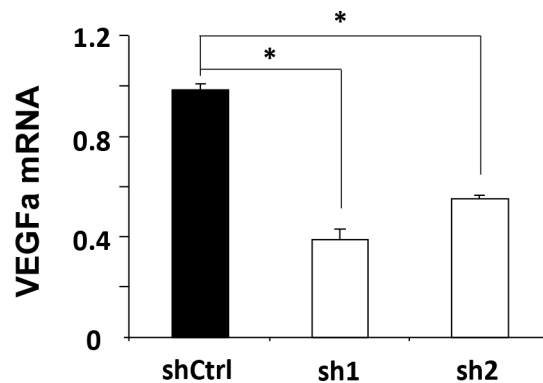

Supplementary Figure S1: NCOA1 was knocked down in MDA-MB-231 cells using shRNA targeting two different region (sh1 and sh2) and VEGFa mRNA levels were examined by qPCR. Scramble knockdown (shCtrl) served as the control.

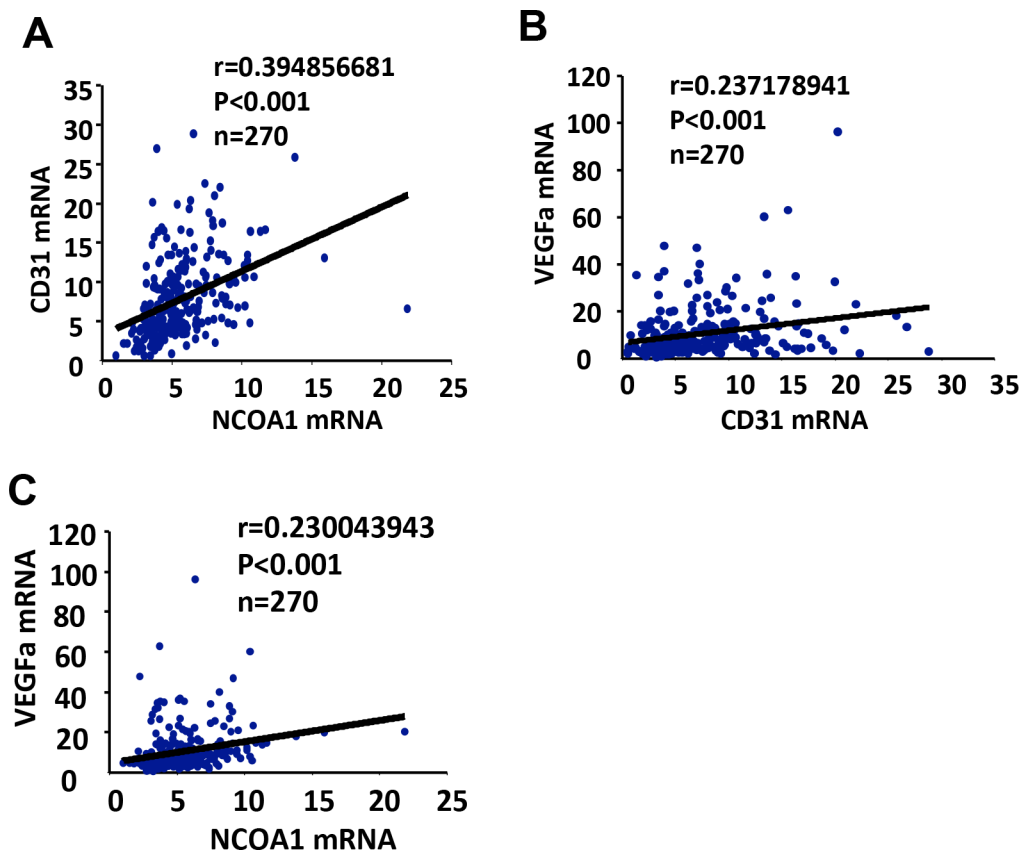

Supplementary Figure S2: The expression levels of *NCOA1*, *CD31* and *VEGFa* mRNAs are positively associated in a cohort of human breast tumors ( $n = 270$ ). The whole genome mRNA expression profile was determined by microarray and deposited in the Oncomine Database (<https://www.oncomine.com/resource/main.html>) by Dr. Bittner M at International Genomics Consortium in Arizona. The correlation relationships in expression levels between *NCOA1* and *CD31* mRNAs (panel a), between *CD31* and *VEGFa* mRNAs (panel b), and between *NCOA1* and *VEGFa* mRNAs (panel c) were analyzed using Pearson Correlation Coefficient ( $r$  value) and statistical significance ( $p$  value).

**Supplementary Table S1: PCR Primers and TaqMan QPCR Probes**

| Amplicons                         | Forward primers                | Reverse primers                  | TaqMan probes                      |
|-----------------------------------|--------------------------------|----------------------------------|------------------------------------|
| QPCR:                             |                                |                                  |                                    |
| mNcoa1 <sup>(1)</sup>             | tatctctccagcccatggtgt          | caaagttcccttggttggc              | tcatccacgtgccaccatcca              |
| mCD31                             | gctggtgctctatgcaagc            | atggatgctgtgatggtga              | universal probe #64 <sup>(2)</sup> |
| mVEGFa                            | gcagcttgagtaaacaagc            | ggtcccgaaacctgag                 | universal probe #4                 |
| mVEGFb                            | cccagccaccagaagaaa             | acattgcccatgagttcat              | universal probe # 10               |
| mVEGFc                            | aacacacagaagtgtctcctaaa        | tcgcacacggtctctgta               | universal probe #31                |
| m $\beta$ -actin                  | ctaaggccaacctgaaaag            | accagaggcatacagggaca             | universal probe #64                |
| hNCOA1 <sup>(3)</sup>             | tgcagcagaatgtctccag            | aaagttggcctcacctgg               | universal probe #15                |
| hVEGFa                            | cgcaagaaatcccgtataa            | aatgctttctccgctctga              | universal probe #1                 |
| hHIF1 $\alpha$                    | ttttcaagcagtaggaattgga         | gtgatgtagtagctgatgatcg           | universal probe #66                |
| hc-Fos                            | actaccactcaccgcagac            | ccaggtccgtgcagaagt               | universal probe #67                |
| hNF- $\kappa$ B                   | ctggcagctcttctcaaagc           | tccaggtcatagagaggctca            | universal probe # 22               |
| h $\beta$ -actin                  | ccaaccgcgagaagatga             | ccagaggcgtacagggatag             | universal probe #64                |
| PCR for ChIP assays:              |                                |                                  |                                    |
| Region A (268 bps) <sup>(4)</sup> | ggacaccataccgatggaac           | gaacaaagttggggctctga             |                                    |
| Region B (339 bps)                | aagctgtgagcctggagaag           | cactgtggagtctggcaaaa             |                                    |
| Region C (207 bps)                | gaagcaactccagtcacaaa           | cacacgtcctcactctcgaa             |                                    |
| Region D (325 bps)                | ttttcaggtgtgaacctg             | ctgaccggtccacctaacc              |                                    |
| PCR for human VEGFa promoter:     |                                |                                  |                                    |
| VP (bp -1986/96)                  | gtaggtaccatcccgttcacagcctaga   | gttaccatggcggctgaccggtccacctaacc |                                    |
| MA1                               | ttagtgctggcggtaggcacgcaggcct   | tggaggccaggcctgctcctaccgcca      |                                    |
| MA2                               | aggctcttccctcccagtcggaaccaca   | cgggaagctgtgtggtccgactgggaggga   |                                    |
| MH1                               | Ggttttgccagactccacagaacaggtctc | ctgggagggaagaggacctgttctgtggagtc |                                    |

<sup>(1)</sup>mNcoa1, mouse Ncoa1;

<sup>(2)</sup>The universal probe for each mRNA was matched by searching the Universal ProbeLibrary (Roche Biotechnology) using the web-based ProbeFinder software (<http://www.universalprobelibrary.com>);

<sup>(3)</sup>hNCOA1, human NCOA1;

<sup>(4)</sup>bps, base pairs.
